# Supplementary material
Source: MDPI journal article supplement (https://www.mdpi.com/2311-5637/9/6/560)
Supplement: s1 [file s1]

# Oral administration of animal and plant protein mixture with *Lactiplantibacillus plantarum* IDCC 3501 improves protein digestibility

Hyeonji Jeon <sup>1,†</sup>, Hayoung Kim <sup>2,†</sup>, Minjee Lee <sup>2</sup>, Jinseok Moon <sup>3</sup>, Jungyeon Kim <sup>4</sup>, Jungwoo Yang <sup>2,\*</sup> and Younghoon Jung <sup>1,\*</sup>

## Supplementary material

**Table S1.** The concentration of macronutrients of normal diet (ND) and high protein diet (HPD)

| Nutrients                                   |   |      |                                            |   |      |
|---------------------------------------------|---|------|--------------------------------------------|---|------|
| Normal diet (ND)                            |   |      | High protein diet (HPD)                    |   |      |
| Protein                                     | % | 18.6 | Protein                                    | % | 40   |
| Fat (ether extract)                         | % | 6.2  | Fat (ether extract)                        | % | 4.6  |
| Carbohydrate (available)                    | % | 44.2 | Carbohydrate (available)                   | % | 32.6 |
| Crude fiber                                 | % | 3.5  | Crude fiber                                | % | 2.6  |
| Neutral detergent fiber                     | % | 14.7 | Neutral detergent fiber                    | % | 10.8 |
| Ash                                         | % | 5.3  | Ash                                        | % | 3.9  |
| Micronutrients<br>(mineral, vitamin, etcl.) | % | 7.5  | Micronutrients<br>(mineral, vitamin, etc.) | % | 5.5  |
| Total                                       | % | 100  | Total                                      | % | 100  |

**Table S2.** The composition of amino acids in normal diet (ND).

| <b>Amino acids</b> |   |     |
|--------------------|---|-----|
| Glutamic acid      | % | 3.4 |
| Leucine            | % | 1.8 |
| Proline            | % | 1.6 |
| Aspartic acid      | % | 1.4 |
| Alanine            | % | 1.1 |
| Serine             | % | 1.1 |
| Arginine           | % | 1.0 |
| Phenylalanine      | % | 1.0 |
| Lysine             | % | 0.9 |
| Valine             | % | 0.9 |
| Glycine            | % | 0.8 |
| Isoleucine         | % | 0.8 |
| Threonine          | % | 0.7 |
| Tyrosine           | % | 0.6 |
| Histidine          | % | 0.4 |
| Methionine         | % | 0.4 |
| Cysteine           | % | 0.3 |
| Tryptophan         | % | 0.2 |

**Table S3.** The content of constitutive amino acids in the mixture of animal and plant protein sample

| Amino acids       | Unit (g/100 g) | Percentage (%) |
|-------------------|----------------|----------------|
| Glutamate         | 16.45 ± 0.88   | 9.37           |
| Aspartate         | 7.88 ± 0.37    | 4.96           |
| Leucine           | 7.84 ± 0.50    | 5.02           |
| Lysine            | 6.64 ± 0.42    | 19.56          |
| Proline           | 6.63 ± 0.36    | 7.88           |
| Valine            | 4.52 ± 0.75    | 2.39           |
| Serine            | 4.22 ± 0.40    | 4.10           |
| Isoleucine        | 4.22 ± 0.73    | 5.38           |
| Threonine         | 4.17 ± 0.01    | 5.02           |
| Phenylalanine     | 3.64 ± 0.36    | 9.33           |
| Alanine           | 3.45 ± 0.17    | 3.27           |
| Tyrosine          | 2.75 ± 0.44    | 4.33           |
| Glycine           | 2.01 ± 0.12    | 2.33           |
| Histidine         | 1.96 ± 0.16    | 7.90           |
| Methionine        | 1.80 ± 0.10    | 4.04           |
| Cysteine          | 1.52 ± 0.07    | 1.81           |
| Tryptophan        | 0.98 ± 0.02    | 2.14           |
| Arginine          | 0.39 ± 0.15    | 1.17           |
| Total amino acids | 84.07 ± 0.26   | 100            |

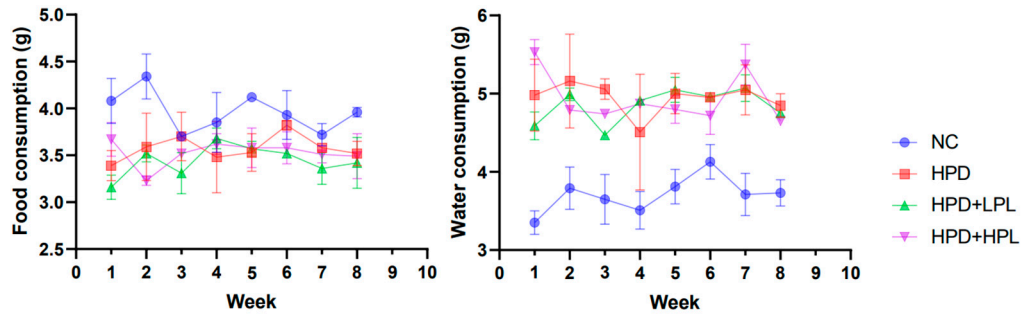

**Figure S1.** Daily water and food intake. **(a)** Average daily food intake changes during the animal experiment. **(b)** Average daily water intake changes during the animal experiment. NC: Normal control group; HPD: High-protein diet group; HPD + LPL: group treated with high-protein diet with  $5 \times 10^7$  CFU/day *L. plantarum* IDCC 3501; HPD + HPL: group treated with high-protein diet with  $5 \times 10^8$  CFU/day *L. plantarum* IDCC 3501. Values are mean with SD.

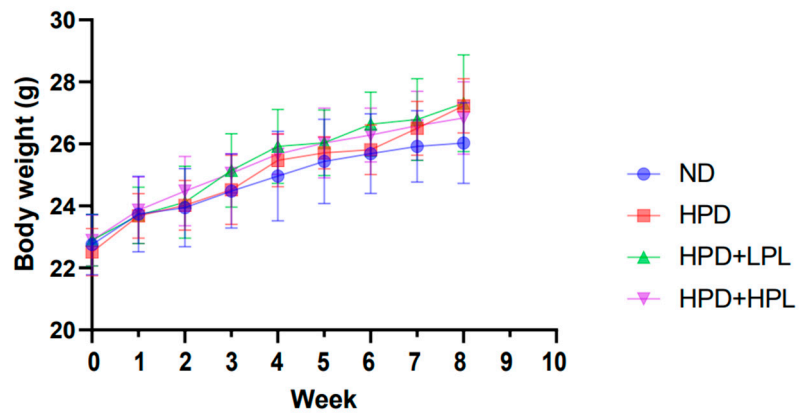

**Figure S2.** Body weight changes. Average body weight changes during the animal experiment. NC: Normal control group; HPD: High-protein diet group; HPD + LPL: group treated with high-protein diet with  $5 \times 10^7$  CFU/day *L. plantarum* IDCC 3501; HPD + HPL: group treated with high-protein diet with  $5 \times 10^8$  CFU/day *L. plantarum* IDCC 3501. Values are mean with SD.

**Table S4.** The concentration of free amino acid profiles in the blood serum of mice. Values are mean with SD. Different superscript letters (a-b) indicate significant differences between the groups ( $P \leq 0.05$ ).

| ( $\mu\text{mol/L}$ ) | Normal diet                       | High protein diet                 | High protein diet<br>& low <i>L. plantarum</i> | High protein diet<br>& high <i>L. plantarum</i> |
|-----------------------|-----------------------------------|-----------------------------------|------------------------------------------------|-------------------------------------------------|
| Glutamine             | 3014.30 $\pm$ 680.20 <sup>a</sup> | 2405.36 $\pm$ 342.00 <sup>a</sup> | 2427.52 $\pm$ 324.47 <sup>a</sup>              | 2442.28 $\pm$ 562.84 <sup>a</sup>               |
| Taurine               | 557.43 $\pm$ 76.11 <sup>a</sup>   | 510.03 $\pm$ 94.66 <sup>a</sup>   | 525.07 $\pm$ 49.61 <sup>a</sup>                | 479.51 $\pm$ 69.96 <sup>a</sup>                 |
| Alanine               | 188.52 $\pm$ 53.10 <sup>a</sup>   | 211.44 $\pm$ 51.80 <sup>a</sup>   | 215.68 $\pm$ 38.39 <sup>a</sup>                | 267.41 $\pm$ 46.62 <sup>b</sup>                 |
| Lysine                | 144.64 $\pm$ 18.24 <sup>ab</sup>  | 145.12 $\pm$ 34.13 <sup>ab</sup>  | 141.29 $\pm$ 29.57 <sup>a</sup>                | 193.99 $\pm$ 39.35 <sup>b</sup>                 |
| Proline               | 180.30 $\pm$ 40.34 <sup>a</sup>   | 162.06 $\pm$ 41.16 <sup>a</sup>   | 171.13 $\pm$ 18.17 <sup>a</sup>                | 181.87 $\pm$ 26.49 <sup>a</sup>                 |
| Glycine               | 164.16 $\pm$ 35.26 <sup>a</sup>   | 142.67 $\pm$ 33.69 <sup>a</sup>   | 155.61 $\pm$ 15.68 <sup>a</sup>                | 159.79 $\pm$ 22.88 <sup>a</sup>                 |
| Valine                | 82.76 $\pm$ 40.97 <sup>a</sup>    | 114.61 $\pm$ 20.71 <sup>ab</sup>  | 120.42 $\pm$ 35.18 <sup>ab</sup>               | 149.04 $\pm$ 27.13 <sup>b</sup>                 |
| Arginine              | 121.25 $\pm$ 10.92 <sup>a</sup>   | 124.27 $\pm$ 27.98 <sup>a</sup>   | 117.70 $\pm$ 17.09 <sup>a</sup>                | 141.80 $\pm$ 18.77 <sup>a</sup>                 |
| Leucine               | 68.86 $\pm$ 7.77 <sup>a</sup>     | 86.49 $\pm$ 21.27 <sup>ab</sup>   | 91.30 $\pm$ 32.66 <sup>ab</sup>                | 119.47 $\pm$ 24.14 <sup>b</sup>                 |
| Threonine             | 75.81 $\pm$ 5.90 <sup>a</sup>     | 80.91 $\pm$ 23.80 <sup>a</sup>    | 82.99 $\pm$ 19.04 <sup>a</sup>                 | 105.50 $\pm$ 24.40 <sup>a</sup>                 |
| Serine                | 67.14 $\pm$ 18.16 <sup>a</sup>    | 60.68 $\pm$ 18.01 <sup>a</sup>    | 59.99 $\pm$ 6.83 <sup>a</sup>                  | 73.74 $\pm$ 13.98 <sup>a</sup>                  |
| Tyrosine              | 53.36 $\pm$ 8.62 <sup>a</sup>     | 54.02 $\pm$ 16.26 <sup>b</sup>    | 53.91 $\pm$ 11.10 <sup>b</sup>                 | 63.63 $\pm$ 16.00 <sup>b</sup>                  |
| Isoleucine            | 39.01 $\pm$ 5.91 <sup>a</sup>     | 45.28 $\pm$ 10.08 <sup>ab</sup>   | 47.61 $\pm$ 15.31 <sup>ab</sup>                | 61.58 $\pm$ 11.07 <sup>b</sup>                  |
| Phenylalanine         | 37.89 $\pm$ 6.16 <sup>a</sup>     | 36.77 $\pm$ 7.17 <sup>a</sup>     | 37.99 $\pm$ 6.38 <sup>a</sup>                  | 43.11 $\pm$ 5.73 <sup>a</sup>                   |
| Methionine            | 25.08 $\pm$ 11.77 <sup>a</sup>    | 29.32 $\pm$ 8.84 <sup>a</sup>     | 28.73 $\pm$ 6.24 <sup>a</sup>                  | 37.77 $\pm$ 7.85 <sup>a</sup>                   |
| Histidine             | 32.50 $\pm$ 10.44 <sup>a</sup>    | 27.38 $\pm$ 4.43 <sup>a</sup>     | 29.23 $\pm$ 3.35 <sup>a</sup>                  | 32.24 $\pm$ 3.84 <sup>a</sup>                   |
| Glutamate             | 11.60 $\pm$ 3.46 <sup>a</sup>     | 19.27 $\pm$ 2.96 <sup>b</sup>     | 22.69 $\pm$ 5.22 <sup>b</sup>                  | 21.56 $\pm$ 2.38 <sup>b</sup>                   |
| Tryptophan            | 9.65 $\pm$ 6.97 <sup>a</sup>      | 10.05 $\pm$ 1.96 <sup>a</sup>     | 11.09 $\pm$ 2.66 <sup>a</sup>                  | 13.36 $\pm$ 3.68 <sup>a</sup>                   |
| Cysteine              | 31.58 $\pm$ 60.02 <sup>a</sup>    | 9.93 $\pm$ 3.29 <sup>a</sup>      | 7.96 $\pm$ 2.66 <sup>a</sup>                   | 7.77 $\pm$ 1.54 <sup>a</sup>                    |
| Aspartate             | 3.70 $\pm$ 2.39 <sup>a</sup>      | 7.33 $\pm$ 1.46 <sup>b</sup>      | 7.88 $\pm$ 1.48 <sup>b</sup>                   | 7.50 $\pm$ 1.58 <sup>b</sup>                    |
| Asparagine            | 0.08 $\pm$ 0.03 <sup>a</sup>      | 0.06 $\pm$ 0.02 <sup>a</sup>      | 0.07 $\pm$ 0.01 <sup>a</sup>                   | 0.09 $\pm$ 0.03 <sup>a</sup>                    |
| GABA                  | 0.53 $\pm$ 0.24 <sup>a</sup>      | 0.12 $\pm$ 0.18 <sup>b</sup>      | 0.00 $\pm$ 0.00 <sup>b</sup>                   | 0.05 $\pm$ 0.12 <sup>b</sup>                    |
